# Supplementary material for: Breadth and visibility of children’s lower limb chronic musculoskeletal pain: a scoping review
Source: PubMed Central journal article supplement — BMJ Open. 2024 Oct 29;14(10):e082801. doi: 10.1136/bmjopen-2023-082801 (PMC11529614; doi:10.1136/bmjopen-2023-082801), 2024-10-29
Supplement: bmjopen-14-10-s003.pdf [file bmjopen-14-10-s003.pdf]

**Supplementary Table 3:** The 124 conditions found in this review, and whether or not they were associated with the ICD-11 chronic pain manifestation code

| Condition                                                                                                                                                                                                                                                                                                                     | Was there an ICD-11 manifestation code for chronic pain available? |
|-------------------------------------------------------------------------------------------------------------------------------------------------------------------------------------------------------------------------------------------------------------------------------------------------------------------------------|--------------------------------------------------------------------|
| Acute lymphoblastic leukaemia                                                                                                                                                                                                                                                                                                 | Yes                                                                |
| Persistent ankle pain subsequent to a strain or sprain                                                                                                                                                                                                                                                                        | No                                                                 |
| Coeliac disease                                                                                                                                                                                                                                                                                                               | No                                                                 |
| Cerebral Palsy. This also includes pain subsequent to surgical interventions relating to Cerebral Palsy                                                                                                                                                                                                                       | No                                                                 |
| Cystic Fibrosis                                                                                                                                                                                                                                                                                                               | No                                                                 |
| Persistent hip pain due to femoroacetabular impingements                                                                                                                                                                                                                                                                      | Yes                                                                |
| Fibrous dysplasia. This includes both mono-ostotic and polyostotic.                                                                                                                                                                                                                                                           | No                                                                 |
| Haemophilia including FVII deficiency                                                                                                                                                                                                                                                                                         | No                                                                 |
| Persistent hip pain due to developmental (congenital) hip dysplasia                                                                                                                                                                                                                                                           | No                                                                 |
| Inflammatory arthropathies. These include Ankylosing Spondylitis or undifferentiated Spondyloarthropathy                                                                                                                                                                                                                      | No                                                                 |
| Inguinal hernia                                                                                                                                                                                                                                                                                                               | No                                                                 |
| Joint instability, including hip, knee, patella or ankle                                                                                                                                                                                                                                                                      | Yes                                                                |
| All types of Juvenile idiopathic arthritis. This includes oligoarthritis, polyarthritis, systemic, psoriatic arthritis, enthesitis-related and undifferentiated                                                                                                                                                               | Yes                                                                |
| Lyme Arthritis                                                                                                                                                                                                                                                                                                                | Yes                                                                |
| All types of Muscular Dystrophy. This includes Duchene, Becker, fascioscapulohumeral, limb girdle, myotonic.                                                                                                                                                                                                                  | No                                                                 |
| Musculoskeletal pain. This includes primary, idiopathic and chronic widespread pain (Juvenile fibromyalgia).                                                                                                                                                                                                                  | No                                                                 |
| Neurofibromatosis Type 1                                                                                                                                                                                                                                                                                                      | No                                                                 |
| Dysplasia. This includes conditions such as osteoarthritis with spondyloepiphyseal involvement (mutation of type II collagen gene, COL2A1, Skeletal dysplasia and open physes, Protusio acetabulae Multiple epiphyseal dysplasia Spondyloepimetaphyseal dysplasia, BUT EXCLUDES High or low bone mass or low bone dysplasias" | Yes                                                                |
| Osteomyelitis, including brodie's abscess                                                                                                                                                                                                                                                                                     | No                                                                 |
| Persistent anterior knee pain due to patellofemoral pain syndrome and chondromalacia patellae                                                                                                                                                                                                                                 | Yes                                                                |
| Henoch-Schoenlein Purpura                                                                                                                                                                                                                                                                                                     | No                                                                 |
| Spinal Muscular Atrophy                                                                                                                                                                                                                                                                                                       | Yes                                                                |
| Persistent lower limb pain subsequent to limb amputation                                                                                                                                                                                                                                                                      | No                                                                 |
| Von Willebrand disorder                                                                                                                                                                                                                                                                                                       | No                                                                 |
| Stress fracture                                                                                                                                                                                                                                                                                                               | No                                                                 |
| Arteriovenous Malformation                                                                                                                                                                                                                                                                                                    | No                                                                 |
| Talipes Equinovarus                                                                                                                                                                                                                                                                                                           | No                                                                 |
| Brucellosis                                                                                                                                                                                                                                                                                                                   | No                                                                 |
| Hyperimmunoglobulin D Syndrome                                                                                                                                                                                                                                                                                                | No                                                                 |
| Hyperparathyroidism, including primary hyperparathyroidism                                                                                                                                                                                                                                                                    | No                                                                 |
| High bone mass dysplasia. This includes Osteopetrosis tarda, Melorheostosis (mesenchymal dysplasia), Camurati-Engelmann (Type I), Osteopathia striata but EXCLUDES general Dysplasia or low bone mass                                                                                                                         | No                                                                 |
| Philadelphia chromosome-positive CML                                                                                                                                                                                                                                                                                          | No                                                                 |
| PIK3CA-related disorder                                                                                                                                                                                                                                                                                                       | No                                                                 |
| Scurvy                                                                                                                                                                                                                                                                                                                        | No                                                                 |
| Slipped capital femoral epiphysis                                                                                                                                                                                                                                                                                             | No                                                                 |
| Spina Bifida                                                                                                                                                                                                                                                                                                                  | No                                                                 |
| Cryopyrin-associated periodic syndrome                                                                                                                                                                                                                                                                                        | No                                                                 |
| Dermatomyositis                                                                                                                                                                                                                                                                                                               | No                                                                 |
| Ewing Sarcoma                                                                                                                                                                                                                                                                                                                 | No                                                                 |

|                                                                                                                                                                                               |     |
|-----------------------------------------------------------------------------------------------------------------------------------------------------------------------------------------------|-----|
| Fibroadipose vascular anomaly (FAVA)                                                                                                                                                          | No  |
| Ganglion                                                                                                                                                                                      | No  |
| Klippel-Trenaunay syndrome (vascular malformation)                                                                                                                                            | No  |
| Legg-Calve-Perthes Disease                                                                                                                                                                    | No  |
| Liposynovitis prepatellaris (Hoffa's syndrome)                                                                                                                                                | No  |
| Myopathy                                                                                                                                                                                      | No  |
| Osteogenesis imperfecta                                                                                                                                                                       | No  |
| Osteoid osteoma                                                                                                                                                                               | No  |
| Restless leg syndrome                                                                                                                                                                         | No  |
| Disorders of the meniscus. This includes symptomatic discoid meniscus, meniscocapsular separation and meniscal ossicle.                                                                       | Yes |
| Auto-immune polyendocrinopathy candidiasis ectodermal dystrophy                                                                                                                               | No  |
| Chondroblastoma                                                                                                                                                                               | No  |
| Chronic granulomatous disease                                                                                                                                                                 | No  |
| Coalition. This includes any location in the foot for example talocalcaneal or talonavicular                                                                                                  | No  |
| Exertional compartment syndrome                                                                                                                                                               | No  |
| Arthritis related to Crohn's disease                                                                                                                                                          | No  |
| Enthesopathy                                                                                                                                                                                  | No  |
| Familial Mediterranean fever arthritis                                                                                                                                                        | No  |
| Flat foot. Consider only paediatric flexible flat foot, not rigid relating to spasticity or coalition                                                                                         | No  |
| Fracture of the lower limb. This includes femur, ischial tuberosity, pelvis, tibia, fibula, ankle, foot                                                                                       | No  |
| Generalised joint hypermobility syndrome                                                                                                                                                      | Yes |
| Human immunodeficiency virus                                                                                                                                                                  | No  |
| Hypophosphatasia as a result of Homozygous mutation of ALPL                                                                                                                                   | No  |
| Iliotibial band syndrome                                                                                                                                                                      | Yes |
| Ischiofemoral impingement                                                                                                                                                                     | Yes |
| Osteochondral lesion & Osteochondritis Dissecans                                                                                                                                              | No  |
| Osteosarcoma                                                                                                                                                                                  | Yes |
| Pigmented villonodular synovitis                                                                                                                                                              | Yes |
| Persistent lower limb pain post surgery.                                                                                                                                                      | No  |
| Septic (pyogenic) arthritis                                                                                                                                                                   | No  |
| Relapsing Polychondritis                                                                                                                                                                      | No  |
| Sickle Cell Disease                                                                                                                                                                           | No  |
| Tuberculosis infection                                                                                                                                                                        | No  |
| Vitamin D deficiency                                                                                                                                                                          | No  |
| Wilson disease                                                                                                                                                                                | No  |
| Beta thalassemia minor                                                                                                                                                                        | No  |
| Growing pains                                                                                                                                                                                 | No  |
| Pseudotumor (idiopathic intracranial hypertension)                                                                                                                                            | No  |
| Sjogren's syndrome                                                                                                                                                                            | No  |
| Spinal meningioma                                                                                                                                                                             | No  |
| Rhabdomyolysis                                                                                                                                                                                | No  |
| Heterotrophic Ossification                                                                                                                                                                    | No  |
| Neuroblastoma                                                                                                                                                                                 | No  |
| Metaphyseal Chondrodysplasias type Schmid                                                                                                                                                     | No  |
| Accessory bone. This includes Os Subfibulare, navicular, Os subtibiale, Os trigonum, ossicle, subfibular ossicle                                                                              | No  |
| Activated phosphoinositide 3-kinase (PI3K) delta syndrome                                                                                                                                     | No  |
| Anatomical variants of lower limb. This includes 'Too long' anteromedial calcaneal process, Limb length secondary to ABI, Angular and rotational deformities, Retroversion of acetabular dome | No  |
| Apophysitis                                                                                                                                                                                   | No  |
| Arthritis due to Bancroftian filariasis (Filarial arthritis)                                                                                                                                  | No  |

|                                                                                                                                                    |     |
|----------------------------------------------------------------------------------------------------------------------------------------------------|-----|
| Autosomal dominant precocious osteoarthropathy                                                                                                     | No  |
| Avascular necrosis (also known as Osteonecrosis)                                                                                                   | No  |
| Behcet's disease                                                                                                                                   | No  |
| Benign bone tumour/lesion. This includes osteochondroma, chondroma benign and benign lesion of proximal femur                                      | No  |
| Chondral defects & cartilage pain disorders of the lower limb                                                                                      | No  |
| Chondrolysis                                                                                                                                       | No  |
| Chronic infantile neurologic cutaneous and articular syndrome (CINCA)                                                                              | No  |
| Cirsoid aneurysm                                                                                                                                   | No  |
| Epiphyseal arrest                                                                                                                                  | No  |
| COPA Syndrome (genetic)                                                                                                                            | No  |
| Focal periphyseal oedema                                                                                                                           | No  |
| Gorham-stout syndrome                                                                                                                              | No  |
| Haploinsufficiency of A20 with new mutation p.W365R                                                                                                | No  |
| Persistent lower limb pain resulting from complications arising post fracture. For example, ankle impingement resulting from bimalleolar fracture. | No  |
| Tarsometatarsal interval injury                                                                                                                    | No  |
| Intraarticular loose body                                                                                                                          | Yes |
| Intra-articular venous malformation of the knee                                                                                                    | No  |
| Post infective arthritis including Noro or influenza virus                                                                                         | No  |
| Nuclear factor I type A variant                                                                                                                    | No  |
| Osteoblastoma                                                                                                                                      | No  |
| Osteochondrosis                                                                                                                                    | No  |
| Osteofibrous dysplasia (ossifying fibroma)                                                                                                         | No  |
| Pachydermoperiostosis                                                                                                                              | No  |
| Paraneoplastic arthritis                                                                                                                           | No  |
| Patellar Hypertension Syndrome                                                                                                                     | No  |
| Reactive arthropathy                                                                                                                               | No  |
| Sting-Associated Vasculopathy (SAVI)                                                                                                               | No  |
| Benign tumours of synovium. This includes Synovial chondromatosis, Synovial haemangioma, Intra-articular synovial lipoma                           | No  |
| Synovitis. This includes both chronic and transient.                                                                                               | Yes |
| Takayasu arteritis                                                                                                                                 | No  |
| Talo-patello-scapoid osteolysis                                                                                                                    | No  |
| Talus Partitus                                                                                                                                     | No  |
| Tendon disorders of the lower limb. This includes tibialis posterior and flexor hallucis longus tendinopathy and adductor tendinitis.              | No  |
| Tenosynovitis, inflammatory arthritis                                                                                                              | Yes |
| Traumatic Joint dislocation                                                                                                                        | No  |
| Recurrent macrophage activation syndrome                                                                                                           | No  |
